# Supplementary material for: The Mediatory Role of the Boredom and Loneliness Dimensions in the Development of Problematic Internet Use
Source: MDPI journal article supplement (doi:10.3390/ijerph20054446), 2023-03-02
Supplement: s1 [file s1]

# Supplementary File. Correlations between psychopathological variables.

|                                  | IAT Subscale Salience | IAT Subscale Excessive Use | IAT Subscale Neglect Work | IAT Subscale Anticipation | IAT Subscale Lack of Control | IAT Subscale Neglect Social Life | IAT Total score | MSBS Disengagement | MSBS High Arousal | MSBS Inattention | MSBS Low Arousal | MSBS Time Perception | MSBS Total score | ILS Social Loneliness | ILS Emotional Loneliness | ILS General Loneliness | ILS Total score | DASS-21 Depression | DASS-21 Anxiety Subscale | DASS-21 Stress Subscale |
|----------------------------------|-----------------------|----------------------------|---------------------------|---------------------------|------------------------------|----------------------------------|-----------------|--------------------|-------------------|------------------|------------------|----------------------|------------------|-----------------------|--------------------------|------------------------|-----------------|--------------------|--------------------------|-------------------------|
| IAT Subscale Excessive Use       | 0,668                 |                            |                           |                           |                              |                                  |                 |                    |                   |                  |                  |                      |                  |                       |                          |                        |                 |                    |                          |                         |
| IAT Subscale Neglect Work        | 0,558                 | 0,667                      |                           |                           |                              |                                  |                 |                    |                   |                  |                  |                      |                  |                       |                          |                        |                 |                    |                          |                         |
| IAT Subscale Anticipation        | 0,519                 | 0,473                      | 0,411                     |                           |                              |                                  |                 |                    |                   |                  |                  |                      |                  |                       |                          |                        |                 |                    |                          |                         |
| IAT Subscale Lack of Control     | 0,569                 | 0,738                      | 0,636                     | 0,433                     |                              |                                  |                 |                    |                   |                  |                  |                      |                  |                       |                          |                        |                 |                    |                          |                         |
| IAT Subscale Neglect Social Life | 0,435                 | 0,379                      | 0,313                     | 0,31                      | 0,291                        |                                  |                 |                    |                   |                  |                  |                      |                  |                       |                          |                        |                 |                    |                          |                         |
| IAT Total Score                  | 0,841                 | 0,895                      | 0,805                     | 0,641                     | 0,825                        | 0,514                            |                 |                    |                   |                  |                  |                      |                  |                       |                          |                        |                 |                    |                          |                         |
| MSBS Disengagement               | 0,374                 | 0,343                      | 0,345                     | 0,199                     | 0,285                        | 0,164                            | 0,39            |                    |                   |                  |                  |                      |                  |                       |                          |                        |                 |                    |                          |                         |
| MSBS High Arousal                | 0,362                 | 0,291                      | 0,295                     | 0,186                     | 0,25                         | 0,12                             | 0,345           | 0,792              |                   |                  |                  |                      |                  |                       |                          |                        |                 |                    |                          |                         |
| MSBS Inattention                 | 0,348                 | 0,405                      | 0,481                     | 0,195                     | 0,389                        | 0,13                             | 0,45            | 0,739              | 0,679             |                  |                  |                      |                  |                       |                          |                        |                 |                    |                          |                         |
| MSBS Low Arousal                 | 0,355                 | 0,276                      | 0,276                     | 0,161                     | 0,201                        | 0,162                            | 0,325           | 0,822              | 0,762             | 0,629            |                  |                      |                  |                       |                          |                        |                 |                    |                          |                         |
| MSBS Time Perception             | 0,172                 | 0,101                      | 0,101                     | 0,06                      | 0,076                        | 0,012                            | 0,127           | 0,521              | 0,504             | 0,375            | 0,433            |                      |                  |                       |                          |                        |                 |                    |                          |                         |
| MSBS Total score                 | 0,384                 | 0,334                      | 0,348                     | 0,192                     | 0,28                         | 0,144                            | 0,386           | 0,947              | 0,884             | 0,793            | 0,876            | 0,674                |                  |                       |                          |                        |                 |                    |                          |                         |
| ILS Social Loneliness            | 0,223                 | 0,168                      | 0,176                     | 0,079                     | 0,088                        | 0,136                            | 0,196           | 0,301              | 0,278             | 0,193            | 0,498            | 0,086                | 0,327            |                       |                          |                        |                 |                    |                          |                         |
| ILS Emotional Loneliness         | 0,356                 | 0,289                      | 0,302                     | 0,186                     | 0,224                        | 0,206                            | 0,348           | 0,611              | 0,541             | 0,458            | 0,728            | 0,304                | 0,637            | 0,511                 |                          |                        |                 |                    |                          |                         |
| ILS General Loneliness           | 0,336                 | 0,272                      | 0,287                     | 0,159                     | 0,193                        | 0,18                             | 0,321           | 0,572              | 0,519             | 0,419            | 0,753            | 0,224                | 0,599            | 0,662                 | 0,791                    |                        |                 |                    |                          |                         |
| ILS Total score                  | 0,361                 | 0,291                      | 0,307                     | 0,173                     | 0,209                        | 0,201                            | 0,346           | 0,601              | 0,549             | 0,444            | 0,785            | 0,253                | 0,634            | 0,781                 | 0,881                    | 0,949                  |                 |                    |                          |                         |
| DASS-21 Depression Subscale      | 0,354                 | 0,311                      | 0,336                     | 0,181                     | 0,239                        | 0,168                            | 0,36            | 0,674              | 0,633             | 0,552            | 0,721            | 0,268                | 0,684            | 0,348                 | 0,574                    | 0,599                  | 0,62            |                    |                          |                         |
| DASS-21 Anxiety Subscale         | 0,24                  | 0,211                      | 0,181                     | 0,126                     | 0,177                        | 0,11                             | 0,237           | 0,406              | 0,514             | 0,351            | 0,435            | 0,188                | 0,448            | 0,17                  | 0,367                    | 0,361                  | 0,371           | 0,65               |                          |                         |
| DASS-21 Stress Subscale          | 0,298                 | 0,261                      | 0,258                     | 0,185                     | 0,226                        | 0,11                             | 0,304           | 0,547              | 0,656             | 0,477            | 0,544            | 0,242                | 0,585            | 0,192                 | 0,455                    | 0,439                  | 0,458           | 0,765              | 0,734                    |                         |
| DASS-21 Total score              | 0,332                 | 0,291                      | 0,289                     | 0,182                     | 0,239                        | 0,145                            | 0,335           | 0,606              | 0,668             | 0,513            | 0,634            | 0,259                | 0,639            | 0,267                 | 0,52                     | 0,523                  | 0,541           | 0,901              | 0,88                     | 0,921                   |

DASS-21: Depression. Anxiety and Stress Scale-21; ILS: Italian Loneliness Scale; MSBS: Multidimensional State Boredom Scale; IAT: Internet Addiction Scale.
